# Supplementary material
Source: bioRxiv or medRxiv preprint supplement (https://medrxiv.org/highwire/filestream/68774/field_highwire_adjunct_files/0/19003848-1.pdf)
Supplement: Supplementary file [file 19003848-1.pdf]

## Supplementary material to accompany the manuscript:

Diet-derived fruit and vegetable metabolites suggest sex-specific mechanisms conferring protection against osteoporosis in humans

By Kelsey M. Mangano, *et al.*

This document contains supplemental tables S1 to S9, and supplemental figures S1 to S5.

### List of tables:

Table S1. Plasma metabolites significantly associated with fruit and vegetable intake

Table S2. Plasma metabolites associating with fruit and vegetable intake in both men and women

Table S3. Pathways enriched from 66 plasma metabolites associating with high fruit and vegetable intake in women

Table S4. Pathways enriched from 38 plasma metabolites associating with high fruit and vegetable intake in men

Table S5. Plasma metabolites significantly associated with osteoporosis status

Table S6. Significantly enriched pathways based on 33 osteoporosis-associated metabolites in women

Table S7. Significantly enriched pathways based on 40 osteoporosis-associated metabolites in men

Table S8. Metabolite-inhibitor relationships for the steroid hormone biosynthesis pathway

Table S9. Abbreviations of osteoporosis-associated metabolites displayed in heat maps showing correlation between those metabolites and fruit/vegetable intake

### List of figures:

Figure S1. Plasma metabolites significantly associated with FV intake

Figure S2. Plasma metabolites significantly associated with OS status

Figure S3. PCA of OS associated metabolites in BPROS women

Figure S4. PC 1 values are a strong indicator of OS status in BPROS women

Figure S5. PCA of OS associated metabolites in BPROS men

**Table S1. Plasma metabolites significantly associated with fruit and vegetable intake**

| Sex | Metabolite *                                  | Metabolite class                                        | Identifiers **     | P-value  | Beta   |
|-----|-----------------------------------------------|---------------------------------------------------------|--------------------|----------|--------|
| W   | proline                                       | arginine and proline                                    | 1898, HMDB0000162  | 0.0388   | -0.016 |
| W   | S-1-pyrroline-5-carboxylate                   | arginine and proline                                    | 42370, HMDB0001301 | 0.0162   | -0.047 |
| W   | 3-carboxy-4-methyl-5-propyl-2-furanpropanoate | bio-toxin / drug / xenobiotic                           | 31787, HMDB0061112 | 0.0416   | 0.329  |
| W   | 6-hydroxyindole sulfate                       | bio-toxin / drug / xenobiotic                           | 48698, NA          | 0.0281   | -0.109 |
| W   | naproxen                                      | bio-toxin / drug / xenobiotic                           | 12122, HMDB0001923 | 0.026    | -32    |
| W   | 1,3,7-trimethylurate                          | caffeine                                                | 34404, HMDB0002123 | 0.00755  | -0.445 |
| W   | 1,7-dimethylurate                             | caffeine                                                | 34400, HMDB0011103 | 0.0157   | -0.234 |
| W   | 3-methylxanthine                              | caffeine                                                | 32445, HMDB0001886 | 0.0491   | -0.172 |
| W   | paraxanthine                                  | caffeine                                                | 18254, HMDB0001860 | 0.0339   | -0.178 |
| W   | theobromine                                   | caffeine                                                | 18392, HMDB0002825 | 0.0335   | -0.094 |
| W   | arachidonate (20:4n6)                         | carnitine / fatty acid                                  | 1110, HMDB0001043  | 0.0424   | 0.01   |
| W   | caproate (6:0)                                | carnitine / fatty acid                                  | 32489, HMDB0000535 | 0.000977 | 0.06   |
| W   | docosahexaenoate (DHA; 22:6n3)                | carnitine / fatty acid                                  | 44675, HMDB0002183 | 0.000203 | 0.065  |
| W   | docosapentaenoate (n3 DPA; 22:5n3)            | carnitine / fatty acid                                  | 32504, HMDB0006528 | 0.0263   | 0.042  |
| W   | eicosapentaenoate (EPA; 20:5n3)               | carnitine / fatty acid                                  | 18467, HMDB0001999 | 0.000179 | 0.034  |
| W   | erucate (22:1n9)                              | carnitine / fatty acid                                  | 1552, HMDB0002068  | 0.0485   | 0.02   |
| W   | linoleoyl ethanolamide                        | carnitine / fatty acid                                  | 52608, HMDB0012252 | 0.000194 | 0.075  |
| W   | glycosyl-N-stearoyl-sphingosine (d18:1/18:0)  | ceramide                                                | 52234, NA          | 0.00503  | -0.046 |
| W   | N-palmitoyl-sphingosine (d18:1/16:0)          | ceramide                                                | 44877, HMDB0004949 | 0.0121   | -0.041 |
| W   | oleoyl ethanolamide                           | ceramide                                                | 38102, HMDB0002088 | 0.0297   | 0.044  |
| W   | 3-methoxytyrosine                             | dopamine / neurological                                 | 12017, HMDB0001434 | 0.00501  | -0.034 |
| W   | dopamine 3-O-sulfate                          | dopamine / neurological                                 | 48407, HMDB0006275 | 0.000567 | 0.277  |
| W   | gamma-glutamylglycine                         | dopamine / neurological                                 | 33949, HMDB0011667 | 0.0443   | -0.05  |
| W   | N-acetyltyrosine                              | dopamine / neurological                                 | 32390, HMDB0000866 | 0.0498   | -0.041 |
| W   | vanillactate                                  | dopamine / neurological                                 | 54910, HMDB0000913 | 0.0438   | -0.072 |
| W   | gamma-carboxyglutamate                        | glutamic acid / glutamine                               | 38754, HMDB0041900 | 0.0218   | -0.027 |
| W   | N-acetylglutamine                             | glutamic acid / glutamine                               | 33943, HMDB0006029 | 0.00797  | -0.058 |
| W   | S-1-pyrroline-5-carboxylate                   | glutamic acid / glutamine                               | 42370, HMDB0001301 | 0.0162   | -0.047 |
| W   | 1-(1-enyl-oleoyl)-GPE (P-18:1)                | glycerophosphlipid                                      | 44621, NA          | 0.047    | 0.023  |
| W   | 1-linoleoylglycerol (18:2)                    | glycerophosphlipid                                      | 27447, NA          | 0.00315  | 0.064  |
| W   | 1-linoleoyl-GPE (18:2)                        | glycerophosphlipid                                      | 36600, HMDB0011507 | 0.0243   | -0.045 |
| W   | 1-linoleoyl-GPI (18:2)                        | glycerophosphlipid                                      | 36594, NA          | 0.00169  | 0.065  |
| W   | 1-oleoylglycerol (18:1)                       | glycerophosphlipid                                      | 21184, HMDB0011567 | 0.00491  | 0.041  |
| W   | 1-palmitoleoylglycerol (16:1)                 | glycerophosphlipid                                      | 52431, HMDB0011565 | 0.0253   | 0.065  |
| W   | 1-palmitoyl-2-arachidonoyl-GPI (16:0/20:4)    | glycerophosphlipid                                      | 52467, HMDB0009789 | 0.0277   | -0.077 |
| W   | 1-palmitoylglycerol (16:0)                    | glycerophosphlipid                                      | 21127, HMDB0031074 | 0.0444   | 0.019  |
| W   | 2-linoleoylglycerol (18:2)                    | glycerophosphlipid                                      | 32506, HMDB0011538 | 0.00212  | 0.107  |
| W   | 2-oleoylglycerol (18:1)                       | glycerophosphlipid                                      | 21232, HMDB0011537 | 0.0174   | 0.049  |
| W   | glycine                                       | glycine                                                 | 58, HMDB0000123    | 0.0283   | -0.024 |
| W   | iminodiacetate                                | glycine                                                 | 21025, HMDB0011753 | 1.45E-05 | 0.262  |
| W   | glutarate                                     | lysine / nitric oxide                                   | 396, HMDB0000661   | 0.00872  | 0.05   |
| W   | homoarginine                                  | lysine / nitric oxide                                   | 22137, HMDB0000670 | 0.0177   | 0.033  |
| W   | N-formylmethionine                            | methionine                                              | 2829, HMDB0001015  | 0.0498   | -0.023 |
| W   | S-adenosylhomocysteine                        | methionine                                              | 42382, HMDB0000939 | 0.0452   | -0.016 |
| W   | 2-piperidinone                                | phytochemical / polyphenol                              | 43400, HMDB0011749 | 0.0255   | 0.048  |
| W   | N-methylpipercolate                           | phytochemical / polyphenol                              | 47101, NA          | 0.0352   | -0.186 |
| W   | piperine                                      | phytochemical / polyphenol                              | 33935, HMDB0029377 | 0.0033   | 0.067  |
| W   | S-allylcysteine                               | phytochemical / polyphenol                              | 43239, HMDB0034323 | 0.0126   | 0.110  |
| W   | tartronate (hydroxymalonate)                  | phytochemical / polyphenol                              | 20693, HMDB0035227 | 0.0126   | 0.028  |
| W   | N1-methylinosine                              | purine / pyrimidine / nucleotide                        | 48351, HMDB0002721 | 0.031    | -0.042 |
| W   | S-adenosylhomocysteine                        | purine / pyrimidine / nucleotide                        | 42382, HMDB0000939 | 0.0452   | -0.016 |
| W   | linoleoyl ethanolamide                        | satiety                                                 | 52608, HMDB0012252 | 0.000194 | 0.075  |
| W   | oleoyl ethanolamide                           | satiety                                                 | 38102, HMDB0002088 | 0.0297   | 0.044  |
| W   | 16a-hydroxy DHEA 3-sulfate                    | steroid hormone                                         | 38168, HMDB0062544 | 0.0363   | -0.06  |
| W   | cortisone                                     | steroid hormone                                         | 1769, HMDB0002802  | 0.0118   | 0.038  |
| W   | 3-indoxyl sulfate                             | tryptophan                                              | 27672, HMDB0000682 | 0.045    | 5.9    |
| W   | kynurenine                                    | tryptophan                                              | 15140, HMDB0000684 | 0.0192   | -0.038 |
| W   | 3-(4-hydroxyphenyl)lactate                    | tyrosine                                                | 32197, HMDB0000755 | 0.0474   | -0.024 |
| W   | 3-methoxytyrosine                             | tyrosine                                                | 12017, HMDB0001434 | 0.00501  | -0.034 |
| W   | N-acetyltyrosine                              | tyrosine                                                | 32390, HMDB0000866 | 0.0498   | -0.041 |
| W   | p-cresol glucuronide                          | tyrosine                                                | 48841, HMDB0011686 | 0.0307   | -0.453 |
| W   | p-cresol sulfate                              | tyrosine                                                | 36103, HMDB0011635 | 0.0378   | -0.08  |
| W   | N-acetylneuraminate                           | other: amino sugar and nucleotide sugar                 | 32377, HMDB0000230 | 0.00643  | -0.046 |
| W   | N-acetylaspartate                             | other: aspartic acid                                    | 22185, HMDB0000812 | 7.05E-05 | 0.156  |
| W   | deoxycholate                                  | other: bile acid                                        | 1114, HMDB0000626  | 0.03     | -0.136 |
| W   | S-adenosylhomocysteine                        | other: cysteine                                         | 42382, HMDB0000939 | 0.0452   | -0.016 |
| W   | S-allylcysteine                               | other: cysteine                                         | 43239, HMDB0034323 | 0.0126   | 0.11   |
| W   | gamma-glutamylglycine                         | other: dipeptide                                        | 33949, HMDB0011667 | 0.0443   | -0.05  |
| W   | pyroglutamine                                 | other: glutathione                                      | 46225, HMDB0062558 | 0.0246   | -0.044 |
| W   | glycerate                                     | other: glyoxylate and dicarboxylate / pentose phosphate | 1572, HMDB0000139  | 0.00902  | 0.029  |

|   |                                                                    |                                                         |                        |          |        |
|---|--------------------------------------------------------------------|---------------------------------------------------------|------------------------|----------|--------|
| W | tartarate                                                          | other: glyoxylate and dicarboxylate / pentose phosphate | 15336, HMDB0000956     | 0.000424 | 0.047  |
| W | N-acetylhistidine                                                  | other: histidine                                        | 33946, HMDB0032055     | 0.00963  | -0.051 |
| W | methyl glucopyranoside (alpha + beta)                              | other: monosaccharide                                   | 46144, HMDB0029965     | 0.0157   | 0.174  |
| W | 1-methylnicotinamide                                               | other: nicotinate and nicotinamide                      | 27665, HMDB0000699     | 0.025    | 0.043  |
| W | gulonate                                                           | other: pentose and glucuronate                          | 46957, HMDB0003290     | 0.0436   | -0.072 |
| M | 4-hydroxyglutamate                                                 | arginine and proline                                    | 40499, HMDB0001344     | 0.0197   | 0.106  |
| M | S-1-pyrroline-5-carboxylate                                        | arginine and proline                                    | 42370, HMDB0001301     | 0.0424   | -0.07  |
| M | 6-oxopiperidine-2-carboxylate                                      | bio-toxin / drug / xenobiotic                           | 43231, HMDB0061705     | 0.0272   | 0.063  |
| M | thymol sulfate                                                     | bio-toxin / drug / xenobiotic                           | 36095, HMDB0001878     | 0.00361  | 0.277  |
| M | 3,7-dimethylurate                                                  | caffeine                                                | 34399, HMDB0001982     | 0.0309   | -0.204 |
| M | 5-acetylamino-6-formylamino-3-methyluracil                         | caffeine                                                | 34401, HMDB0011105     | 0.0239   | -0.467 |
| M | theobromine                                                        | caffeine                                                | 18392, HMDB0002825     | 0.00299  | -0.2   |
| M | 2-aminoheptanoate                                                  | carnitine / fatty acid                                  | 43761, HMDB0094649     | 0.0247   | 0.077  |
| M | arachidate (20:0)                                                  | carnitine / fatty acid                                  | 1118, HMDB0002212      | 0.00725  | 0.025  |
| M | deoxycarnitine                                                     | carnitine / fatty acid                                  | 36747, HMDB0001161     | 0.0327   | -0.03  |
| M | docosahexaenoate (DHA; 22:6n3)                                     | carnitine / fatty acid                                  | 44675, HMDB0002183     | 0.0348   | 0.054  |
| M | eicosenoate (20:1)                                                 | carnitine / fatty acid                                  | 33587, HMDB0002231     | 0.0432   | 0.046  |
| M | N-palmitoylglycine                                                 | carnitine / fatty acid                                  | 42092, HMDB0013034     | 0.0108   | 0.042  |
| M | sphinganine                                                        | ceramide                                                | 17769, HMDB0000269     | 0.0293   | -0.024 |
| M | deoxycarnitine                                                     | dopamine / neurological                                 | 36747, HMDB0001161     | 0.0327   | -0.030 |
| M | S-1-pyrroline-5-carboxylate                                        | glutamic acid / glutamine                               | 42370, HMDB0001301     | 0.0424   | -0.07  |
| M | 1-linoleoylglycerol (18:2)                                         | glycerophosphlipid                                      | 27447, NA              | 0.0111   | 0.164  |
| M | 1-linoleoyl-GPG (18:2)                                             | glycerophosphlipid                                      | 54885, NA              | 0.0216   | 0.061  |
| M | 2-linoleoylglycerol (18:2)                                         | glycerophosphlipid                                      | 32506, HMDB0011538     | 0.0319   | 0.168  |
| M | linoleoyl-arachidonoyl-glycerol (18:2/20:4) (m1)                   | glycerophosphlipid                                      | 54955, HMDB0007257     | 0.00291  | 0.26   |
| M | oleoyl-arachidonoyl-glycerol (18:1/20:4) (m2)                      | glycerophosphlipid                                      | 54961, HMDB0007228     | 0.0225   | 0.156  |
| M | phosphoethanolamine                                                | glycerophosphlipid                                      | 1600, HMDB0000224      | 0.0112   | -0.12  |
| M | dimethylglycine                                                    | glycine                                                 | 5086, HMDB0000092      | 0.0171   | 0.047  |
| M | guanidinoacetate                                                   | glycine                                                 | 43802, HMDB0000128     | 0.0459   | -0.035 |
| M | iminodiacetate                                                     | glycine                                                 | 21025, HMDB0011753     | 0.00964  | 0.208  |
| M | 2-aminoadipate                                                     | lysine / nitric oxide                                   | 6146, HMDB0000510      | 0.036    | 0.089  |
| M | homoarginine                                                       | lysine / nitric oxide                                   | 22137, HMDB0000670     | 0.0214   | -0.05  |
| M | methionine sulfone                                                 | methionine                                              | 44878, NA              | 0.0306   | 0.066  |
| M | gamma-tocopherol/beta-tocopherol                                   | phytochemical / polyphenol                              | 52473, HMDB0001492/HMD | 0.035    | 0.065  |
| M | adenosine 5'-monophosphate (AMP)                                   | purine / pyrimidine / nucleotide                        | 32342, HMDB0000045     | 0.00303  | -0.076 |
| M | pseudouridine                                                      | purine / pyrimidine / nucleotide                        | 33442, HMDB0000767     | 0.0303   | 0.042  |
| M | 5alpha-androstan-3alpha,17beta-diol monosulfate (n:steroid hormone |                                                         | 37186, NA              | 0.0169   | 0.096  |
| M | 5alpha-androstan-3beta,17beta-diol monosulfate (m:steroid hormone  |                                                         | 37192, NA              | 0.0371   | 0.05   |
| M | N-acetyltryptophan                                                 | tryptophan                                              | 33959, HMDB0013713     | 0.0427   | 0.077  |
| M | myo-inositol                                                       | other: galactose                                        | 1124, HMDB0000211      | 0.0107   | 0.151  |
| M | gamma-glutamylalanine                                              | other: glutathione                                      | 37063, HMDB0006248     | 0.0456   | -0.208 |
| M | hydantoin-5-propionic acid                                         | other: histidine                                        | 40473, HMDB0001212     | 0.0305   | 0.14   |
| M | myo-inositol                                                       | other: inositol phosphate                               | 1124, HMDB0000211      | 0.0107   | 0.151  |
| M | nicotinamide                                                       | other: nicotinate and nicotinamide                      | 594, HMDB0001406       | 0.00222  | -0.136 |
| M | myo-inositol                                                       | other: pentose and glucuronate                          | 1124, HMDB0000211      | 0.0107   | 0.151  |
| M | acisoga                                                            | other: spermidine                                       | 43258, HMDB0061384     | 0.0205   | 0.09   |
| M | pyridoxate                                                         | other: vitamin                                          | 31555, HMDB0000017     | 0.0245   | 0.084  |

\* m1, m2 indicate different moieties of that metabolite

\*\* identifiers listed are from Metabolon and the Human Metabolome Database

NA = not available

**Table S2. Plasma metabolites associating with fruit and vegetable intake in both men and women**

| <b>Metabolite</b>           | <b>beta: men</b> | <b>P</b> | <b>beta: women</b> | <b>P</b> |
|-----------------------------|------------------|----------|--------------------|----------|
| theobromine                 | -0.200           | 0.003    | -0.094             | 0.0335   |
| S-1-pyrroline-5-carboxylate | -0.070           | 0.0424   | -0.047             | 0.0162   |
| homoarginine                | -0.050           | 0.0214   | 0.033              | 0.0177   |
| docosahexanoate             | 0.054            | 0.0348   | 0.065              | 0.0002   |
| 1-linoleoylglycerol 18:2    | 0.164            | 0.0111   | 0.064              | 0.00315  |
| 2-linoleoylglycerol 18:2    | 0.168            | 0.0319   | 0.107              | 0.00212  |
| iminodiacetate              | 0.208            | 0.00964  | 0.262              | 1.45E-05 |

**Table S3. Pathways enriched from 66 plasma metabolites associating with high fruit and vegetable intake in women**

| <b>Pathway</b>                                        | <b>FDR corr P</b> | <b>Contributing metabolites</b>                                                                                                                                                            |
|-------------------------------------------------------|-------------------|--------------------------------------------------------------------------------------------------------------------------------------------------------------------------------------------|
| Protein synthesis, amino acid biosynthesis            | 1.15E-06          | 3-methoxytyrosine, homoarginine, N-acetylaspartate, N-acetylglutamine, N-acetyltyrosine, N-formylmethionine                                                                                |
| Waste products *                                      | 1.43E-05          | 1,3,7-trimethylurate, 1,7-dimethylurate, 3-methylxanthine, dopamine 3-O-sulfate, eicosapentaenoate (EPA), paraxanthine, p-cresol glucuronide, proline, S-adenosylhomocysteine, theobromine |
| Arginine and proline metabolism                       | 1.20E-04          | proline, S-adenosylhomocysteine, S-1-pyrroline-5-carboxylate                                                                                                                               |
| Tryptophan metabolism                                 | 2.83E-03          | kynurenine, S-adenosylhomocysteine                                                                                                                                                         |
| Prostaglandin and leukotriene metabolism              | 2.83E-03          | arachidonate, N-palmitoyl-sphingosine                                                                                                                                                      |
| Biosynthesis of unsaturated fatty acids               | 3.14E-03          | arachidonate, docosahexaenoate (DHA), docosapentaenoate (n3 DPA), eicosapentaenoate (EPA)                                                                                                  |
| Glycerophospholipid metabolism                        | 3.28E-03          | N-palmitoyl-sphingosine, S-adenosylhomocysteine                                                                                                                                            |
| $\alpha$ -Linolenic acid and linoleic acid metabolism | 3.62E-03          | arachidonate, docosahexaenoate (DHA), docosapentaenoate (n3 DPA), erucate                                                                                                                  |
| Essential hypertension                                | 2.09E-02          | arachidonate, docosahexaenoate (DHA), eicosapentaenoate (EPA)                                                                                                                              |
| Glycine degradation ( <b>creatine biosynthesis</b> )  | 3.28E-02          | glycine, S-adenosylhomocysteine                                                                                                                                                            |
| Leukotriene biosynthesis                              | 4.53E-02          | glycine, arachidonate                                                                                                                                                                      |
| Iminoglycinuria                                       | 4.59E-02          | glycine, proline                                                                                                                                                                           |

\* 1,3,7-trimethylurate, 1,7-dimethylurate, 3-methylxanthine, paraxanthine, and theobromine are all components of the caffeine metabolism pathway

**Table S4. Pathways enriched from 38 plasma metabolites associating with high fruit and vegetable intake in men**

| <b>Pathway</b>                             | <b>FDR corr P</b> | <b>Contributing metabolites</b>                                            |
|--------------------------------------------|-------------------|----------------------------------------------------------------------------|
| Arginine and proline metabolism            | 1.12E-04          | adenosine 5'-monophosphate, guanidinoacetate, S-1-pyrroline-5-carboxylate  |
| Glycine, serine and threonine metabolism   | 1.12E-04          | adenosine 5'-monophosphate, dimethylglycine, guanidinoacetate              |
| Methionine metabolism                      | 8.90E-04          | adenosine 5'-monophosphate, dimethylglycine                                |
| Glutamate metabolism                       | 1.94E-03          | adenosine 5'-monophosphate, S-1-pyrroline-5-carboxylate                    |
| Glycerophospholipid metabolism             | 1.94E-03          | myo-inositol, phosphoethanolamine                                          |
| Protein synthesis, amino acid biosynthesis | 1.94E-03          | 2-aminoadipate, homoarginine, hydantoin-5-propionic acid                   |
| Pyrimidine metabolism                      | 3.24E-03          | adenosine 5'-monophosphate, pseudouridine                                  |
| Caffeine metabolism                        | 1.17E-02          | 3,7-dimethylurate, 5-acetylamino-6-formylamino-3-methyluracil, theobromine |

**Table S5. Plasma metabolites significantly associated with osteoporosis status**

| Sex | Metabolite *                                        | Metabolite class                                 | Identifiers **         | P-value | Beta  |
|-----|-----------------------------------------------------|--------------------------------------------------|------------------------|---------|-------|
| W   | N-acetyl-beta-alanine                               | Ala Arg Trp Tyr / protein                        | 37432, HMDB0061880     | 0.010   | -1.56 |
| W   | 2-aminoheptanoate                                   | carnitine / fatty acid                           | 43761, HMDB0094649     | 0.025   | 0.73  |
| W   | N-(2-furoyl)glycine                                 | carnitine / fatty acid                           | 31536, HMDB0000439     | 0.040   | 0.03  |
| W   | N6,N6,N6-trimethyllysine                            | carnitine / fatty acid                           | 1498, HMDB0001325      | 0.038   | -0.72 |
| W   | lactosyl-N-nervonoyl-sphingosine (d18:1/24:1)       | ceramide                                         | 57370, NA              | 0.012   | 1.07  |
| W   | lactosyl-N-palmitoyl-sphingosine (d18:1/16:0)       | ceramide                                         | 53010, NA              | 0.025   | 1.69  |
| W   | oleoyl-linoleoyl-glycerol (18:1/18:2)               | diacylglycerol                                   | 46799, HMDB0007219     | 0.044   | 0.28  |
| W   | 1-dihomo-linolenylglycerol (20:3)                   | glycerophospholipid                              | 48341, NA              | 0.029   | 0.21  |
| W   | 1-stearoyl-2-linoleoyl-GPC (18:0/18:2)              | glycerophospholipid                              | 52452, HMDB0008039     | 0.029   | 1.98  |
| W   | 1-stearoyl-2-oleoyl-GPE (18:0/18:1)                 | glycerophospholipid                              | 42448, HMDB0008993     | 0.048   | 0.09  |
| W   | glycerate                                           | glyoxylate and dicarboxylate / pentose phosphate | 1572, HMDB0000139      | 0.011   | -1.42 |
| W   | tartarate                                           | glyoxylate and dicarboxylate / pentose phosphate | 15336, HMDB0000956     | 0.036   | -1.15 |
| W   | glutarate                                           | lysine / nitric oxide                            | 396, HMDB0000661       | 0.025   | -1.16 |
| W   | homoarginine                                        | lysine / nitric oxide                            | 22137, HMDB0000670     | 0.009   | -1.37 |
| W   | 3-methyl catechol sulfate (m1)                      | phenylsulfate                                    | 46165, NA              | 0.009   | 0.27  |
| W   | 4-vinylguaiaicol sulfate                            | phenylsulfate                                    | 48442, NA              | 0.043   | 0.16  |
| W   | benzoate                                            | phytochemical and polyphenol                     | 15778, HMDB0001870     | 0.032   | 14.12 |
| W   | S-methylmethionine                                  | phytochemical and polyphenol                     | 38127, HMDB0038670     | 0.011   | -0.40 |
| W   | tartronate (hydroxymalonate)                        | phytochemical and polyphenol                     | 20693, HMDB0035227     | 0.024   | -1.29 |
| W   | threonate                                           | phytochemical and polyphenol                     | 27738, HMDB0000943     | 0.045   | -0.90 |
| W   | hypoxanthine                                        | purine / pyrimidine                              | 3127, HMDB0000157      | 0.016   | -0.75 |
| W   | urate                                               | purine / pyrimidine                              | 1604, HMDB0000289      | 0.015   | -1.68 |
| W   | uridine                                             | purine / pyrimidine                              | 606, HMDB0000296       | 0.008   | -1.80 |
| W   | 5alpha-androstan-3alpha,17beta-diol monosulfate (n) | steroid hormone                                  | 37186, NA              | 0.035   | -0.86 |
| W   | 5alpha-androstan-3alpha,17beta-diol monosulfate (r) | steroid hormone                                  | 37185, NA              | 0.045   | -3.73 |
| W   | 5alpha-androstan-3alpha,17beta-diol disulfate       | steroid hormone                                  | 37184, NA              | 0.030   | -4.60 |
| W   | 5alpha-androstan-3beta,17beta-diol monosulfate (m)  | steroid hormone                                  | 37192, NA              | 0.036   | -1.58 |
| W   | 5alpha-androstan-3beta,17beta-diol disulfate        | steroid hormone                                  | 37190, HMDB0000493     | 0.022   | -3.25 |
| W   | androstenediol (3beta,17beta) disulfate (m1)        | steroid hormone                                  | 37202, HMDB0003818     | 0.010   | -2.02 |
| W   | androstenediol (3beta,17beta) disulfate (m2)        | steroid hormone                                  | 37203, HMDB0003818     | 0.024   | -1.12 |
| W   | androstenediol (3beta,17beta) monosulfate (m1)      | steroid hormone                                  | 37211, HMDB0003818     | 0.012   | -1.73 |
| W   | androstenediol (3beta,17beta) monosulfate (m2)      | steroid hormone                                  | 37210, HMDB0003818     | 0.001   | -1.37 |
| W   | dehydroisoandrosterone sulfate (DHEA-S)             | steroid hormone                                  | 32425, HMDB0001032     | 0.042   | -1.51 |
| M   | 4-guanidinobutanoate                                | Ala Arg Trp Tyr / protein                        | 15681, HMDB0003464     | 0.030   | 5.90  |
| M   | kynurenine                                          | Ala Arg Trp Tyr / protein                        | 15140, HMDB0000684     | 0.042   | 0.84  |
| M   | N-formylphenylalanine                               | Ala Arg Trp Tyr / protein                        | 48433, NA              | 0.036   | 1.51  |
| M   | prolylglycine                                       | Ala Arg Trp Tyr / protein                        | 40703, HMDB0011178     | 0.026   | 2.31  |
| M   | tyramine O-sulfate                                  | Ala Arg Trp Tyr / protein                        | 48408, HMDB0006409     | 0.013   | 0.20  |
| M   | ibuprofen                                           | bio-toxin / drug                                 | 17799, HMDB0001925     | 0.045   | 0.11  |
| M   | carboxyibuprofen                                    | bio-toxin / drug                                 | 43333, HMDB0060564     | 0.041   | 0.04  |
| M   | 2-hydroxyibuprofen                                  | bio-toxin / drug                                 | 43330, HMDB0060920     | 0.042   | 0.06  |
| M   | 3-carboxy-4-methyl-5-propyl-2-furanpropanoate       | bio-toxin / drug                                 | 31787, HMDB0061112     | 0.023   | 0.11  |
| M   | 4-hydroxychlorothalonil                             | bio-toxin / drug                                 | 48441, NA              | 0.021   | -1.97 |
| M   | benzoylecgonine                                     | bio-toxin / drug                                 | 39678, HMDB0041836     | 0.024   | 0.10  |
| M   | 2-hydroxy-3-methylvalerate                          | branched-chain amino acids                       | 36746, HMDB0000317     | 0.049   | 0.12  |
| M   | 3-methyl-2-oxovalerate                              | branched-chain amino acids                       | 15676, HMDB0003736     | 0.014   | 1.49  |
| M   | 4-methyl-2-oxopentanoate                            | branched-chain amino acids                       | 22116, HMDB0000695     | 0.042   | 1.24  |
| M   | alpha-hydroxyisocaproate                            | branched-chain amino acids                       | 22132, HMDB0000746     | 0.006   | 1.22  |
| M   | isoleucine                                          | branched-chain amino acids                       | 1125, HMDB0000172      | 0.004   | 3.94  |
| M   | isovalerylglycine                                   | branched-chain amino acids                       | 35107, HMDB0000678     | 0.041   | 0.99  |
| M   | leucine                                             | branched-chain amino acids                       | 60, HMDB0000687/HMDB00 | 0.020   | 3.43  |
| M   | N-acetylisoleucine                                  | branched-chain amino acids                       | 33967, HMDB0061684     | 0.024   | 1.30  |
| M   | N-acetylleucine                                     | branched-chain amino acids                       | 1587, HMDB0011756      | 0.016   | 0.98  |
| M   | 5-acetylamino-6-amino-3-methyluracil                | caffeine                                         | 34424, HMDB0004400     | 0.043   | -0.39 |
| M   | caffeic acid sulfate                                | caffeine                                         | 53254, HMDB0041708     | 0.006   | 0.14  |
| M   | fructose                                            | carbon metabolism / insulin resistance           | 48195, HMDB0000660     | 0.002   | 0.71  |
| M   | glutaryl carnitine                                  | carnitine / fatty acid                           | 44664, HMDB0013130     | 0.047   | -1.13 |
| M   | isovalerylcarnitine                                 | carnitine / fatty acid                           | 34407, HMDB0000688     | 0.006   | 1.21  |
| M   | linoleate (18:2n6)                                  | carnitine / fatty acid                           | 1105, HMDB0000673      | 0.028   | -2.57 |
| M   | N-(2-furoyl)glycine                                 | carnitine / fatty acid                           | 31536, HMDB0000439     | 0.012   | 0.05  |
| M   | vanillylmandelate                                   | catecholamine                                    | 1567, HMDB0000291      | 0.023   | 1.43  |
| M   | 1-(1-enyl-palmitoyl)-GPC (P-16:0)                   | glycerophospholipid                              | 52474, HMDB0010407     | 0.026   | -4.89 |
| M   | 1-palmitoyl-2-arachidonoyl-GPC (16:0/20:4n6)        | glycerophospholipid                              | 52462, HMDB0007982     | 0.031   | 3.03  |
| M   | 1-stearoyl-2-arachidonoyl-GPC (18:0/20:4)           | glycerophospholipid                              | 42450, HMDB0008048     | 0.033   | 2.84  |
| M   | choline phosphate                                   | glycerophospholipid                              | 34396, HMDB0001565     | 0.023   | 0.81  |
| M   | threonine                                           | glycine serine threonine                         | 1284, HMDB0000167      | 0.030   | -2.73 |
| M   | 2-keto-3-deoxy-gluconate                            | glyoxylate and dicarboxylate / pentose phosphate | 48141, HMDB0001353     | 0.038   | 0.31  |
| M   | ribonate                                            | glyoxylate and dicarboxylate / pentose phosphate | 27731, HMDB0000867     | 0.030   | 0.67  |
| M   | N6-carboxymethyllysine                              | lysine / nitric oxide                            | 36713, NA              | 0.044   | -0.82 |
| M   | pipecolate                                          | lysine / nitric oxide                            | 1444, HMDB0000070      | 0.039   | 0.27  |

|   |                                                |                              |                    |       |       |
|---|------------------------------------------------|------------------------------|--------------------|-------|-------|
| M | hippurate                                      | phytochemical and polyphenol | 15753, HMDB0000714 | 0.041 | -0.62 |
| M | 3-hydroxypyridine sulfate                      | pyridine                     | 48448, NA          | 0.023 | 0.14  |
| M | androstenediol (3beta,17beta) monosulfate (m1) | steroid hormone              | 37211, HMDB0003818 | 0.002 | 1.31  |

\* m1, m2 indicate different moieties of that metabolite

\*\* identifiers listed are from Metabolon and the Human Metabolome Database

Ala Arg Trp Tyr / protein = compounds involved in alanine, arginine, tryptophan, tyrosine or protein metabolism

NA = not available



**Table S6. Significantly enriched pathways based on 33 osteoporosis-associated metabolites in women**

| <b>Pathway</b>                                            | <b>FDR corr P</b> | <b>Contributing metabolites</b>                                                         |
|-----------------------------------------------------------|-------------------|-----------------------------------------------------------------------------------------|
| Phosphatidylcholine biosynthesis                          | 1.41E-04          | 1-stearoyl-2-linoleoyl-GPC (18:0/18:2), 1-stearoyl-2-oleoyl-GPE (18:0/18:1)             |
| Phosphatidylethanolamine biosynthesis                     | 2.96E-02          | oleoyl-linoleoyl-glycerol (18:1/18:2), 1-stearoyl-2-oleoyl-GPE (18:0/18:1)              |
| Degenerative disc disease                                 | 2.29E-04          | hypoxanthine, urate, uridine                                                            |
| Organic anion transport                                   | 6.79E-03          | dehydroisoandrosterone sulfate (DHEA-S), urate                                          |
| SLC-mediated transmembrane transport                      | 6.79E-03          | dehydroisoandrosterone sulfate (DHEA-S), homoarginine, hypoxanthine, urate, uridine     |
| Transport of vitamins, nucleosides, and related molecules | 6.79E-03          | dehydroisoandrosterone sulfate (DHEA-S), hypoxanthine, uridine                          |
| Nucleobase catabolism                                     | 1.05E-02          | hypoxanthine, urate, uridine                                                            |
| Amino acid biosynthesis                                   | 1.53E-02          | homoarginine, N6,N6,N6-trimethyllysine                                                  |
| Steroid hormones                                          | 1.68E-02          | 5alpha-androstan-3beta,17beta-diol disulfate, androstenediol (3beta,17beta) monosulfate |
| Waste products                                            | 3.25E-02          | dehydroisoandrosterone sulfate (DHEA-S), hypoxanthine, urate                            |
| Glyoxylate and dicarboxylate metabolism                   | 4.27E-02          | glycerate, tartarate                                                                    |
| Lysine metabolism                                         | 4.27E-02          | glutarate, N6,N6,N6-trimethyllysine                                                     |
| Glycerophospholipid metabolism                            | 4.27E-02          | 1-stearoyl-2-linoleoyl-GPC (18:0/18:2), 1-stearoyl-2-oleoyl-GPE (18:0/18:1)             |

**Table S7. Significantly enriched pathways based on 40 osteoporosis-associated metabolites in men**

| <b>Pathway</b>                                       | <b>FDR corr P</b> | <b>Contributing metabolites</b>                                                                 |
|------------------------------------------------------|-------------------|-------------------------------------------------------------------------------------------------|
| Valine, leucine and isoleucine biosynthesis          | 1.97E-04          | 4-methyl-2-oxopentanoate, isoleucine                                                            |
| Isoleucine biosynthesis, pyruvate => isoleucine      | 1.86E-02          | isoleucine, threonine                                                                           |
| Essential amino acids                                | 1.97E-04          | isoleucine, threonine                                                                           |
| Aminoacyl-tRNA biosynthesis                          | 3.96E-04          | isoleucine, threonine                                                                           |
| Linoleic acid metabolism, phospholipid => linoleate  | 1.61E-03          | 1-stearoyl-2-arachidonoyl-GPC (18:0/20:4), linoleate (18:2n6)                                   |
| Glycine, serine and threonine metabolism             | 2.14E-03          | choline phosphate, threonine                                                                    |
| Phosphatidylcholine (PC) biosynthesis, choline => PC | 4.78E-03          | 1-stearoyl-2-arachidonoyl-GPC (18:0/20:4), choline phosphate                                    |
| Glycerophospholipid metabolism                       | 8.88E-03          | 1-(1-enyl-palmitoyl)-GPC (P-16:0), 1-stearoyl-2-arachidonoyl-GPC (18:0/20:4), choline phosphate |
| Protein synthesis, amino acid biosynthesis           | 1.56E-02          | 4-guanidinobutanoate, pipecolate                                                                |
| Waste products                                       | 1.87E-02          | 2-hydroxyibuprofen, benzoylecgonine, carboxyibuprofen, hippurate                                |

Results from MetaboAnalyst indicated a trend toward significance for the valine, leucine and isoleucine biosynthesis pathway ( $p = 0.087$ )

**Table S8. Metabolite-inhibitor relationships for the steroid hormone biosynthesis pathway**

| <b>Numeral : Biosynthesis module *</b>                                               | <b>Metabolite</b>       | <b>p-value</b> | <b>beta direction **</b> | <b>Inhibited E.C.# : Gene symbols</b>                            |
|--------------------------------------------------------------------------------------|-------------------------|----------------|--------------------------|------------------------------------------------------------------|
| 3 : progesterone--THDOC;<br>6 : testosterone--androstan-3 $\alpha$ ,17 $\beta$ -diol | linoleate (18:2n6)      | 0.058          | pos                      | 1.3.1.22 : SRD5A1, SRD5A2, SRD5A3                                |
|                                                                                      | oleate/vaccenate (18:1) | 0.054          | pos                      |                                                                  |
|                                                                                      | palmitate (16:0)        | 0.060          | pos                      |                                                                  |
|                                                                                      | piperine                | 0.003          | pos                      |                                                                  |
|                                                                                      | stearate (18:0)         | 0.097          | pos                      |                                                                  |
| 4 : progesterone--5 $\alpha$ -pregnane-3 $\alpha$ ,20 $\alpha$ -diol                 | 1-methylnicotinamide    | 0.025          | pos                      | 1.1.1.149 : AKR1C1                                               |
| 5 : cortisol--cortisone;<br>7 : testosterone--estradiol-17 $\beta$                   | arachidonate (20:4n6)   | 0.042          | pos                      | 1.1.1.62 : HSD17B1, HSD17B2, HSD17B6, HSD17B7, HSD17B8, HSD17B12 |
|                                                                                      | linoleate (18:2n6)      | 0.058          | pos                      |                                                                  |
|                                                                                      | oleate/vaccenate (18:1) | 0.054          | pos                      |                                                                  |
| 1 : cholesterol--progesterone;<br>2 : cholesterol--testosterone                      | deoxycholate            | 0.030          | neg                      | 3.1.6.2 : STS                                                    |
| 6 : testosterone--androstan-3 $\alpha$ ,17 $\beta$ -diol                             | ursodeoxycholate        | 0.083          | neg                      | 1.1.1.357 : AKR1C2, AKR1C3, AKR1C4                               |
| 7 : testosterone--estradiol-17 $\beta$                                               | naproxen                | 0.026          | neg                      | 1.1.1.51 : AKR1C3                                                |
|                                                                                      |                         | 0.026          | neg                      | 2.8.2.4 : SULT1E1                                                |

\* Corresponding to Figure 4 (SterHorm\_path) where the metabolite-enzyme pair is predicted to inhibit partially a biosynthesis module

\*\* a negative beta is interpreted as supporting a reduced capacity for enzyme inhibition

THDOC, tetrahydrodeoxycorticosterone (3 $\alpha$ ,21-dihydroxy-5 $\alpha$ -pregnan-20-one)

**Table S9. Abbreviations of osteoporosis-associated metabolites displayed in heat maps showing correlation between those metabolites and fruit/vegetables**

| Group * | Heat map label | Metabolite                                         | Metabolon ID | P-value | beta  |
|---------|----------------|----------------------------------------------------|--------------|---------|-------|
| M       | 1eP-GPC        | 1-(1-enyl-palmitoyl)-GPC (P-16:0)                  | 52474        | 0.026   | -4.89 |
| W       | 1dLG           | 1-dihomo-linolenylglycerol (20:3)                  | 48341        | 0.029   | 0.21  |
| M       | 1P2A-GPC       | 1-palmitoyl-2-arachidonoyl-GPC (16:0/20:4n6)       | 52462        | 0.031   | 3.03  |
| M       | 1S2A-GPC       | 1-stearoyl-2-arachidonoyl-GPC (18:0/20:4)          | 42450        | 0.033   | 2.84  |
| W       | 1S2L-GPC       | 1-stearoyl-2-linoleoyl-GPC (18:0/18:2)             | 52452        | 0.029   | 1.98  |
| W       | 1S2O-GPE       | 1-stearoyl-2-oleoyl-GPE (18:0/18:1)                | 42448        | 0.048   | 0.09  |
| W       | 2-aHep         | 2-aminoheptanoate                                  | 43761        | 0.025   | 0.73  |
| M       | 2h3mv          | 2-hydroxy-3-methylvalerate                         | 36746        | 0.049   | 0.12  |
| M       | 2hibu          | 2-hydroxyibuprofen                                 | 43330        | 0.042   | 0.06  |
| M       | 2k3dg          | 2-keto-3-deoxy-gluconate                           | 48141        | 0.038   | 0.31  |
| M       | CMPF           | 3-carboxy-4-methyl-5-propyl-2-furanpropanoate      | 31787        | 0.023   | 0.11  |
| M       | 3hps           | 3-hydroxypyridine sulfate                          | 48448        | 0.023   | 0.14  |
| W       | 3mCats         | 3-methyl catechol sulfate (m1)                     | 46165        | 0.009   | 0.27  |
| M       | 3m2oval        | 3-methyl-2-oxovalerate                             | 15676        | 0.014   | 1.49  |
| M       | 4gbut          | 4-guanidinobutanoate                               | 15681        | 0.03    | 5.9   |
| M       | 4hchlorot      | 4-hydroxychlorothalonil                            | 48441        | 0.021   | -1.97 |
| M       | 4m2open        | 4-methyl-2-oxopentanoate                           | 22116        | 0.042   | 1.24  |
| W       | 4-vGuas        | 4-vinylguaiacol sulfate                            | 48442        | 0.043   | 0.16  |
| M       | AAMU           | 5-acetylamino-6-amino-3-methyluracil               | 34424        | 0.043   | -0.39 |
| W       | 5Andro3a17bds  | 5alpha-androstan-3alpha;17beta-diol disulfate      | 37184        | 0.03    | -4.6  |
| W       | 5Andro3a17bms1 | 5alpha-androstan-3alpha;17beta-diol monosulfate (m | 37186        | 0.035   | -0.86 |
| W       | 5Andro3a17bms2 | 5alpha-androstan-3alpha;17beta-diol monosulfate (m | 37185        | 0.045   | -3.73 |
| W       | 5Andro3b17bds  | 5alpha-androstan-3beta;17beta-diol disulfate       | 37190        | 0.022   | -3.25 |
| W       | 5Andro3b17bms  | 5alpha-androstan-3beta;17beta-diol monosulfate (m2 | 37192        | 0.036   | -1.58 |
| M       | a-hicap        | alpha-hydroxyisocaproate                           | 22132        | 0.006   | 1.22  |
| W       | AndroE3b17bds1 | androstenediol (3beta;17beta) disulfate (m1)       | 37202        | 0.01    | -2.02 |
| W       | AndroE3b17bds2 | androstenediol (3beta;17beta) disulfate (m2)       | 37203        | 0.024   | -1.12 |
| W       | AndroE3b17bms1 | androstenediol (3beta;17beta) monosulfate (m1)     | 37211        | 0.012   | -1.73 |
| M       | AndroE3b17bms  | androstenediol (3beta;17beta) monosulfate (m1)     | 37211        | 0.002   | 1.31  |
| W       | AndroE3b17bms2 | androstenediol (3beta;17beta) monosulfate (m2)     | 37210        | 0.001   | -1.37 |
| W       | benzoate       | benzoate                                           | 15778        | 0.032   | 14.12 |
| M       | bEcg           | benzoylecgonine                                    | 39678        | 0.024   | 0.1   |
| M       | caffas         | caffeic acid sulfate                               | 53254        | 0.006   | 0.14  |
| M       | cibu           | carboxyibuprofen                                   | 43333        | 0.041   | 0.04  |
| M       | cholineP       | choline phosphate                                  | 34396        | 0.023   | 0.81  |
| W       | DHEA-S         | dehydroisoandrosterone sulfate (DHEA-S)            | 32425        | 0.042   | -1.51 |
| M       | fructose       | fructose                                           | 48195        | 0.002   | 0.71  |
| W       | glutarate      | glutarate                                          | 396          | 0.025   | -1.16 |
| M       | glutcarn       | glutaryl carnitine                                 | 44664        | 0.047   | -1.13 |
| W       | glycerate      | glycerate                                          | 1572         | 0.011   | -1.42 |
| M       | hippurate      | hippurate                                          | 15753        | 0.041   | -0.62 |
| W       | homoArg        | homoarginine                                       | 22137        | 0.009   | -1.37 |
| W       | hypoxanthine   | hypoxanthine                                       | 3127         | 0.016   | -0.75 |
| M       | ibu            | ibuprofen                                          | 17799        | 0.045   | 0.11  |
| M       | Ile            | isoleucine                                         | 1125         | 0.004   | 3.94  |
| M       | ivalcarn       | isovaleryl carnitine                               | 34407        | 0.006   | 1.21  |
| M       | ivalGly        | isovaleryl glycine                                 | 35107        | 0.041   | 0.99  |
| M       | kynurenine     | kynurenine                                         | 15140        | 0.042   | 0.84  |
| W       | lacN-nerv-sph  | lactosyl-N-nervonoyl-sphingosine (d18:1/24:1)      | 57370        | 0.012   | 1.07  |
| W       | lacN-palm-sph  | lactosyl-N-palmitoyl-sphingosine (d18:1/16:0)      | 53010        | 0.025   | 1.69  |
| M       | Leu            | leucine                                            | 60           | 0.02    | 3.43  |
| M       | linoleate      | linoleate (18:2n6)                                 | 1105         | 0.028   | -2.57 |
| W       | N2fGly         | N-(2-furoyl)glycine                                | 31536        | 0.04    | 0.03  |
| M       | N2fGly         | N-(2-furoyl)glycine                                | 31536        | 0.012   | 0.05  |
| W       | 3mLys          | N6;N6;N6-trimethyllysine                           | 1498         | 0.038   | -0.72 |
| M       | N6-cmLys       | N6-carboxymethyllysine                             | 36713        | 0.044   | -0.82 |
| W       | Nac-Ala        | N-acetyl-beta-alanine                              | 37432        | 0.01    | -1.56 |
| M       | N-acetylIle    | N-acetyl isoleucine                                | 33967        | 0.024   | 1.3   |
| M       | N-acetylLeu    | N-acetyl leucine                                   | 1587         | 0.016   | 0.98  |
| M       | N-formylPhe    | N-formylphenylalanine                              | 48433        | 0.036   | 1.51  |
| W       | Omega-3        | omega-3 fatty acids (18:1/18:2)                    | 46799        | 0.044   | 0.38  |

Figure S1

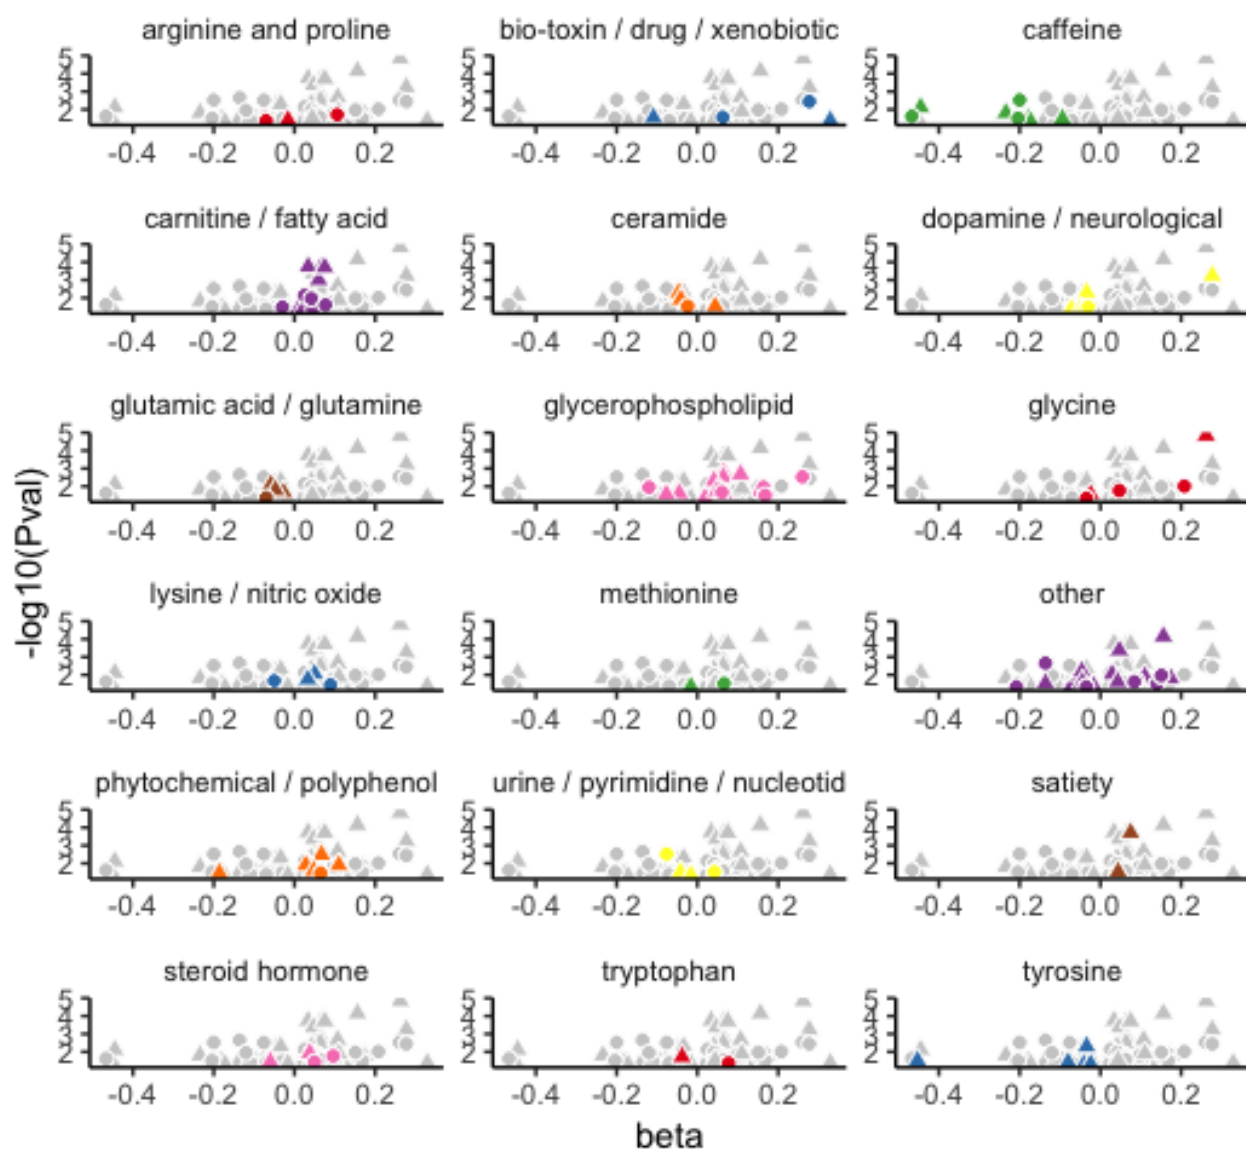

**Figure S1.** Plasma metabolites significantly associated with FV intake. Each panel shows a plot of beta vs  $-\log_{10}(\text{P-value})$  for all metabolites significantly associated with OS (gray) and a specific metabolite class highlighted in color. Data for women are plotted with triangles, for men with circles, and are derived from **Table S1**, which lists 66 metabolite-FV associations for women and 38 for men.

Figure S2

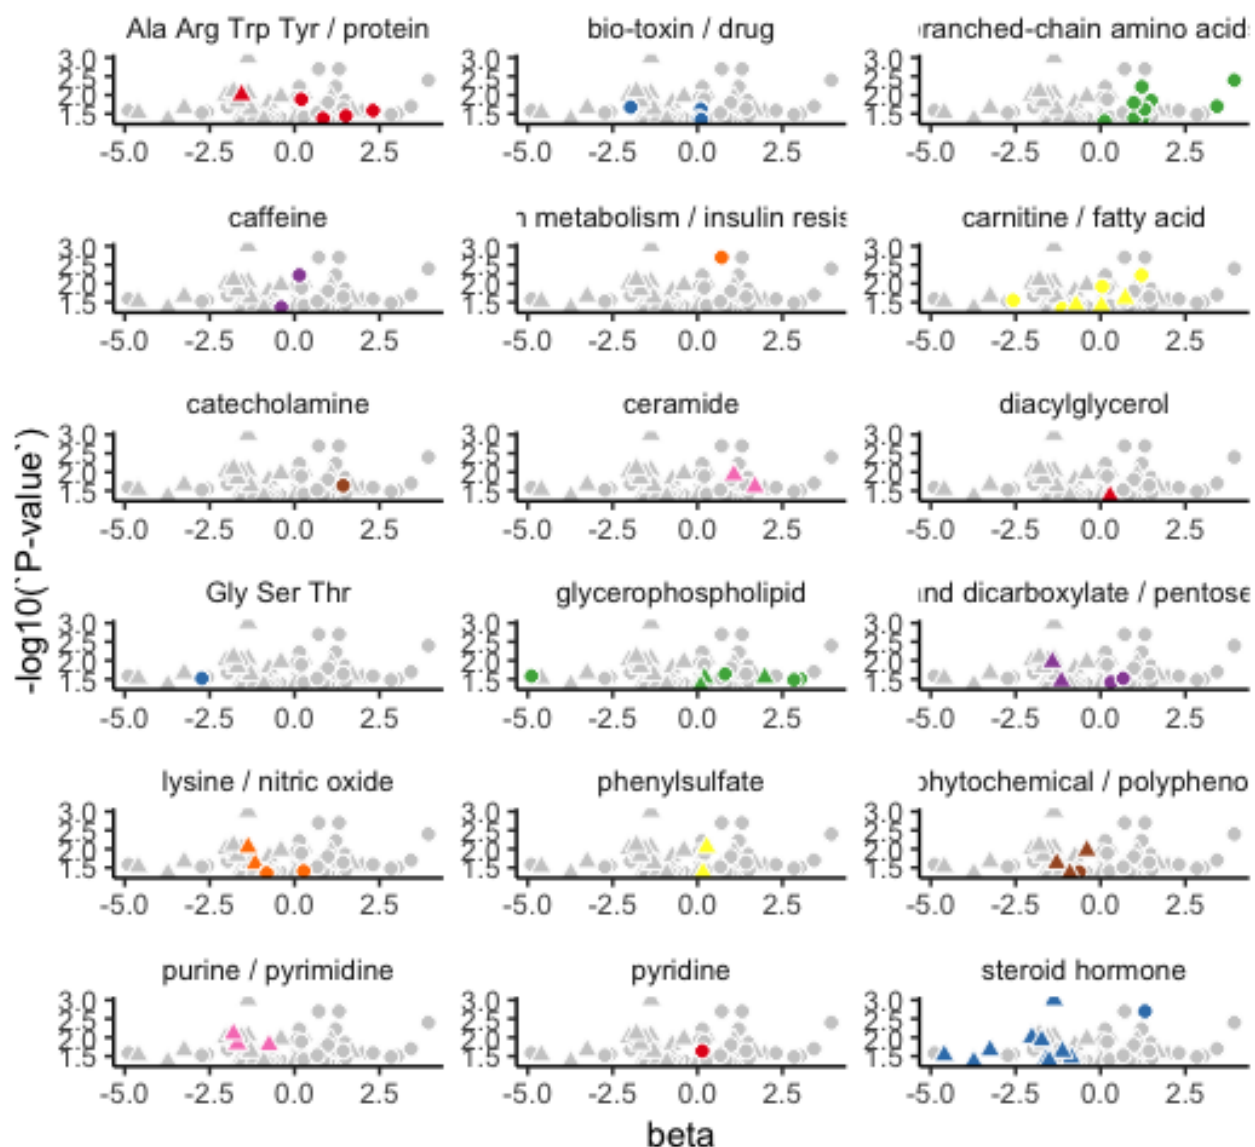

**Figure S2.** Plasma metabolites significantly associated with OS status. Each panel depicts a volcano plot,  $\beta$  vs  $-\log_{10}(P\text{-value})$ , for all metabolites significantly associated with OS (gray) and a distinct metabolite class highlighted in color. Data for women are plotted with triangles, for men with circles, and are derived from **Table S5**, which lists 33 metabolite-FV associations for women and 40 for men.

Figure S3

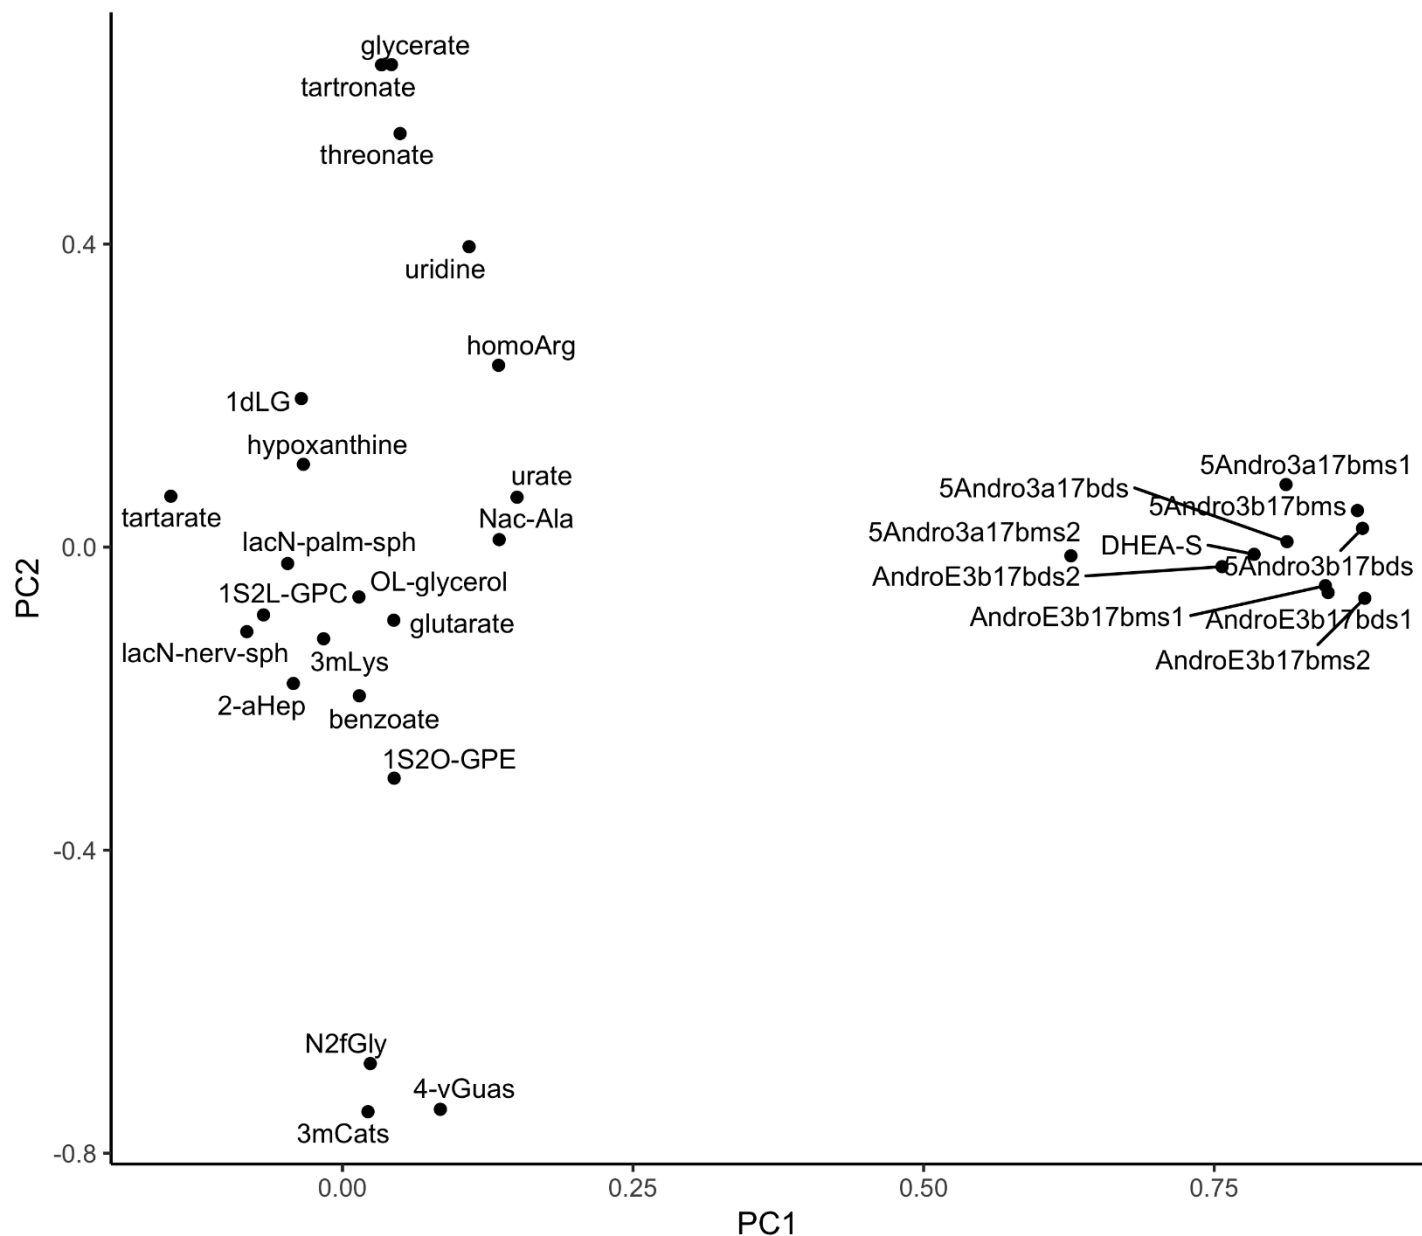

**Figure S3.** PCA of OS-associated metabolites in BPROS women. OS-associated metabolites are plotted by factor 1 (PC1) vs factor 2 (PC2), which in turn represent 21.2% and 10.0% of the total variance. The group of ten steroid hormone metabolites all have highly positive PC1 values and form a tight cluster. Abbreviations for metabolites are defined in **Table S9**.

Figure S4

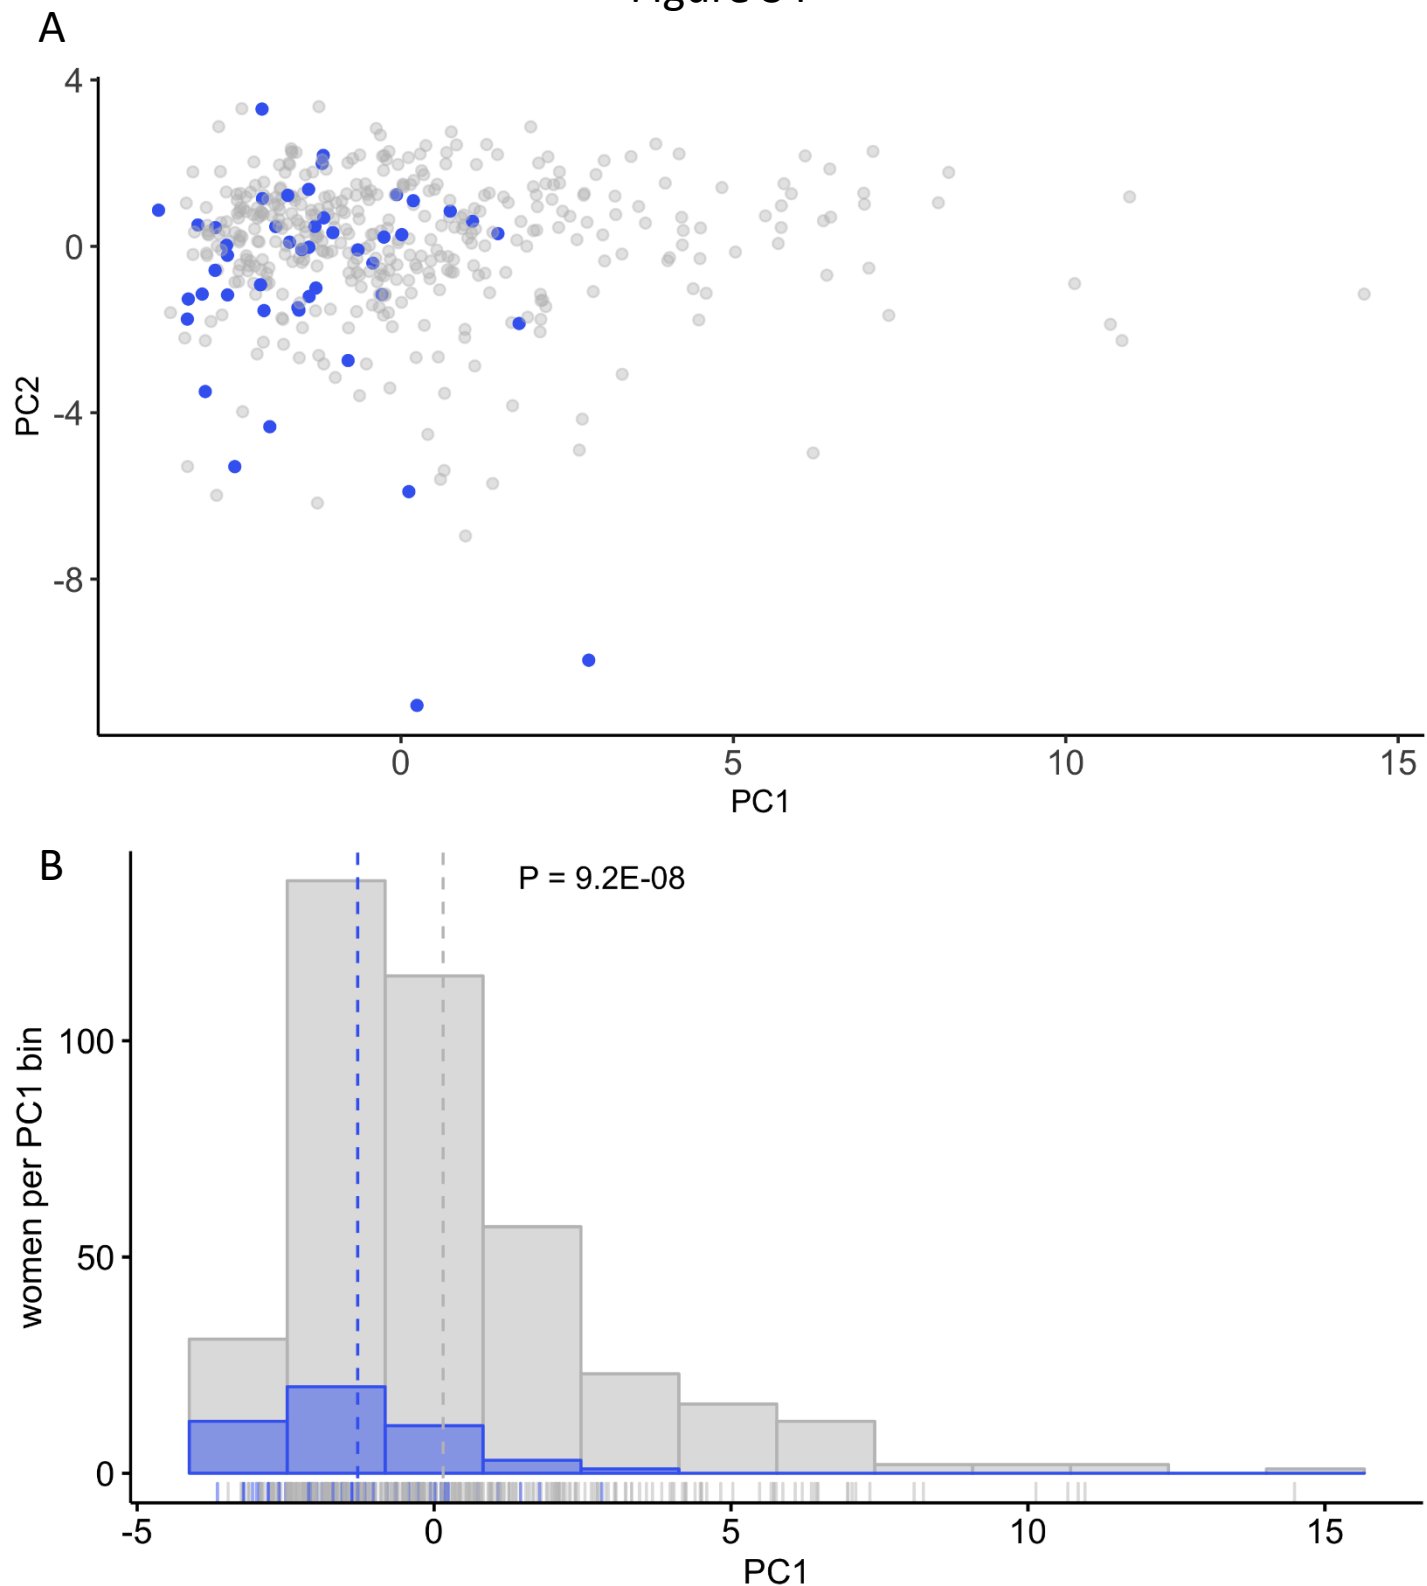

**Figure S4.** PC1 values are a strong indicator of OS status in BPROS women. A) Female participants are plotted according to PC1 and PC2 values with OS status depicted as gray without and blue with osteoporosis. B) A histogram of 12 evenly spaced bins of PC1 values indicates that the mean PC1 values (dotted line) and the distribution of all values for women with OS are shifted toward lower PC1 values than for women without disease ( $P=9.2E-08$ ). Running along the x-axis is a density plot of all women based on their PC1 values, colored by OS status.



Figure S5

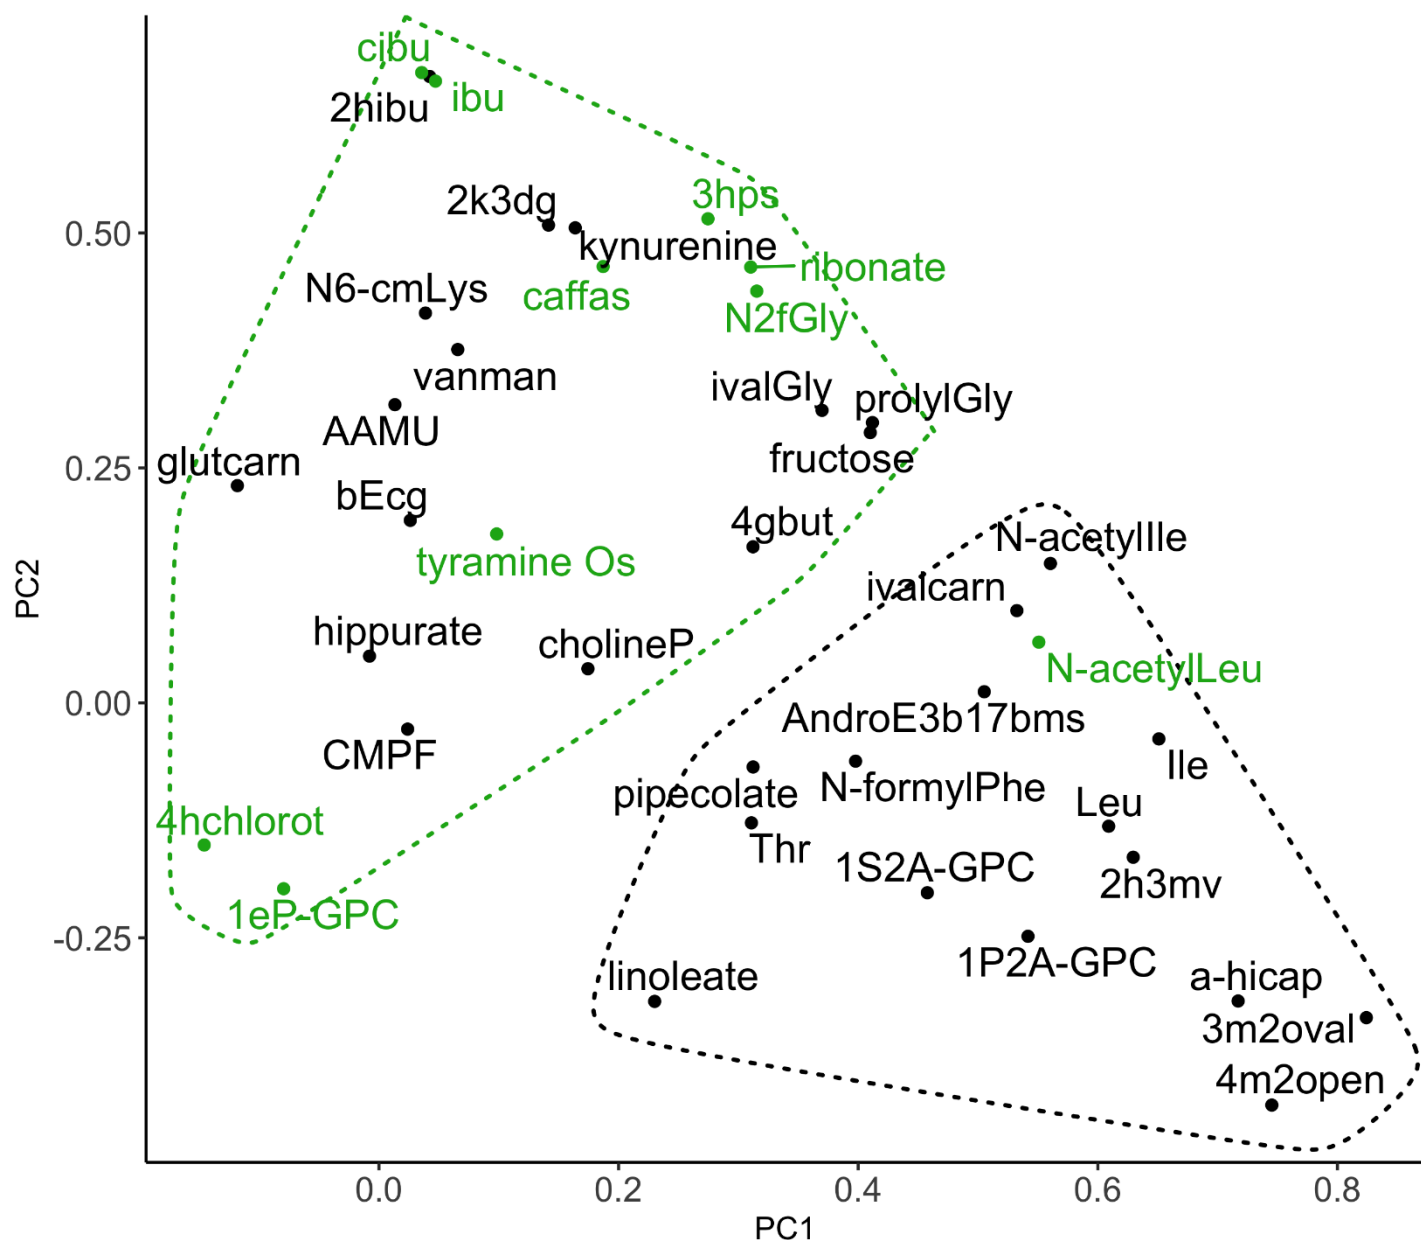

**Figure S5.** PCA of OS-associated metabolites in BPROS men. OS-associated metabolites are plotted by factor 1 (PC1) vs factor 2 (PC2), which represent 15.1% and 10.9% of the total variance, respectively. Green data points are those metabolites whose correlations with FV factor 6 (dark leafy greens, all  $P < 0.10$ ) are exactly opposite to the association with OS incidence, per **Figure 3B**. Abbreviations for metabolites are defined in **Table S9**.
